# Supplementary material for: Near-infrared fluorogenic switches for the detection of Hg(ii) ions: applications in real samples and living cells
Source: Royal Society of Chemistry journal article supplement (doi:10.1039/c9ay00241c), 2019-01-01
Supplement: c9ay00241c1.pdf [file c9ay00241c1.pdf]

## Electronic Supplementary Material for

### Near-Infrared fluorogenic switches for detection of Hg(II) ions: Applications in real samples and living cells

Asaithambi Gomathi,<sup>a</sup> and Periasamy Viswanathamurthi,<sup>a,\*</sup>

<sup>a</sup>Department of Chemistry, Periyar University, Salem, Tamil Nadu, India. 636011

\*To whom correspondence should be addressed, e-mail: [viswanathamurthi@gmail.com](mailto:viswanathamurthi@gmail.com)

Fax: +91 427 2345124

## Experimental section

### Cell culture

HeLa cells were cultured in Dulbecco's modified Eagle's medium (DMEM) supplemented with 10% fetal bovine serum (FBS) at 37 °C under an atmosphere of 5% CO<sub>2</sub>. Cells were plated on 18 mm glass cover slips and allowed to adhere for 24 h.

### Cytotoxicity assay

The methyl thiazolyl tetrazolium (MTT) assay was used to measure the cytotoxicity of probe towards HeLa cells. The cells were seeded into a 96-well cell-culture plate. Various concentrations (0, 20, 40, 60, 80 and 100 μM) of NIRM probe were added to the wells. The cells were incubated at 37°C under 5% CO<sub>2</sub> for 24 h. 10 μL MTT (5 mg/mL) was added to each well and incubated at 37°C under 5% CO<sub>2</sub> for 4 h. Multiskan GO microplate reader was used to measure the absorbance at 510 nm for each well. The viability of cells was calculated according to the following equation: Cell viability (%) = (mean of absorbance value of treatment group) / (mean of absorbance value of control group).

### Cell imaging

HeLa cells were initially cultured in a tissue culture flask containing DMEM medium supplemented with 10% FBS, penicillin (100 μg mL<sup>-1</sup>) and streptomycin (100 μg mL<sup>-1</sup>) in a CO<sub>2</sub> incubator. Prior to imaging studies, the cells were seeded into a 6 well plate and grown in DMEM medium at 37°C till 80% confluence in CO<sub>2</sub> incubator. Subsequently, the cells were

washed thrice with sterile phosphate buffered saline (PBS), incubated with 10  $\mu\text{M}$  of NIRM probe in DMEM at 37°C for 30 min in a CO<sub>2</sub> incubator. The cells were again washed with sterile PBS to remove excess probe and their images were acquired using a fluorescence microscope (Eclipse Ti-U, Nikon, USA) with a filter that allowed green light emission. The cells were subsequently incubated with sterile PBS separate set with 30  $\mu\text{M}$  Hg<sup>2+</sup> for 1 h. The images of the cells were acquired with a fluorescence microscope.

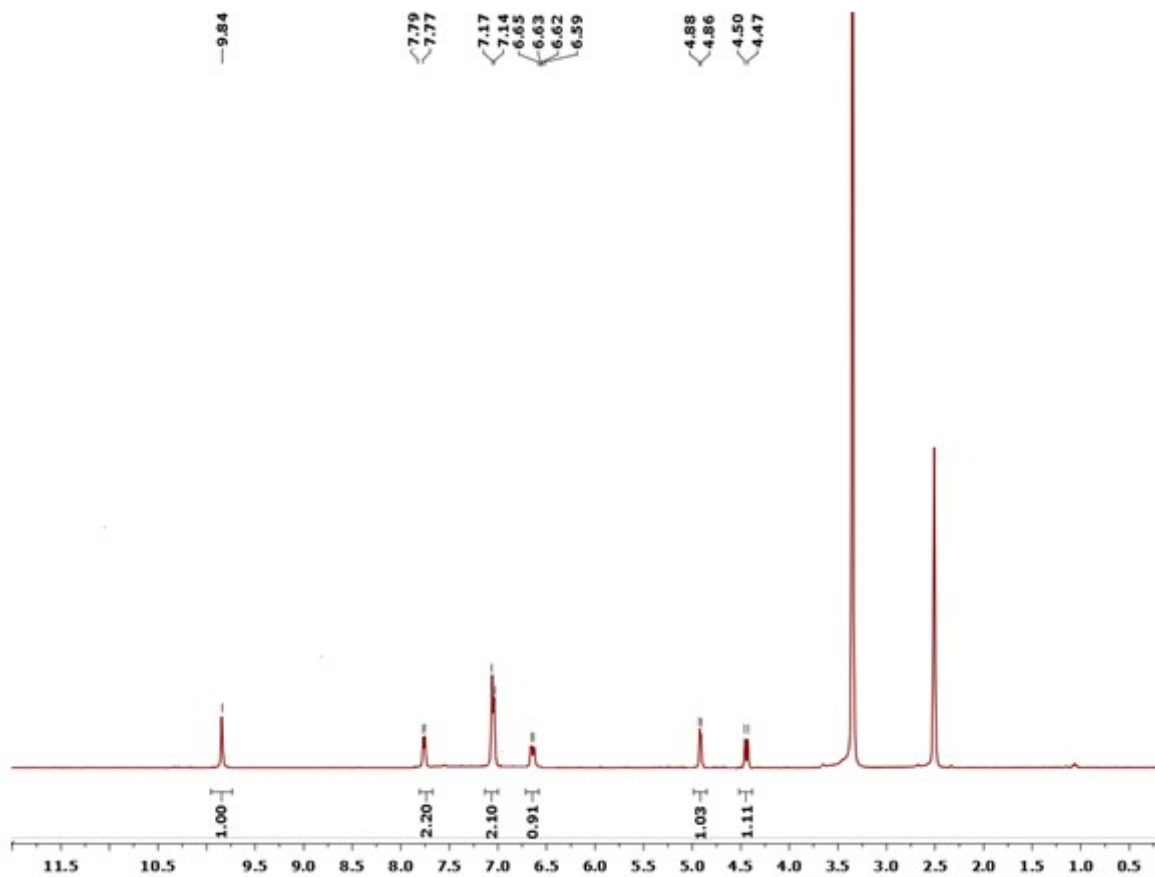

**Fig. S1.** <sup>1</sup>H-NMR spectrum of compound 1.

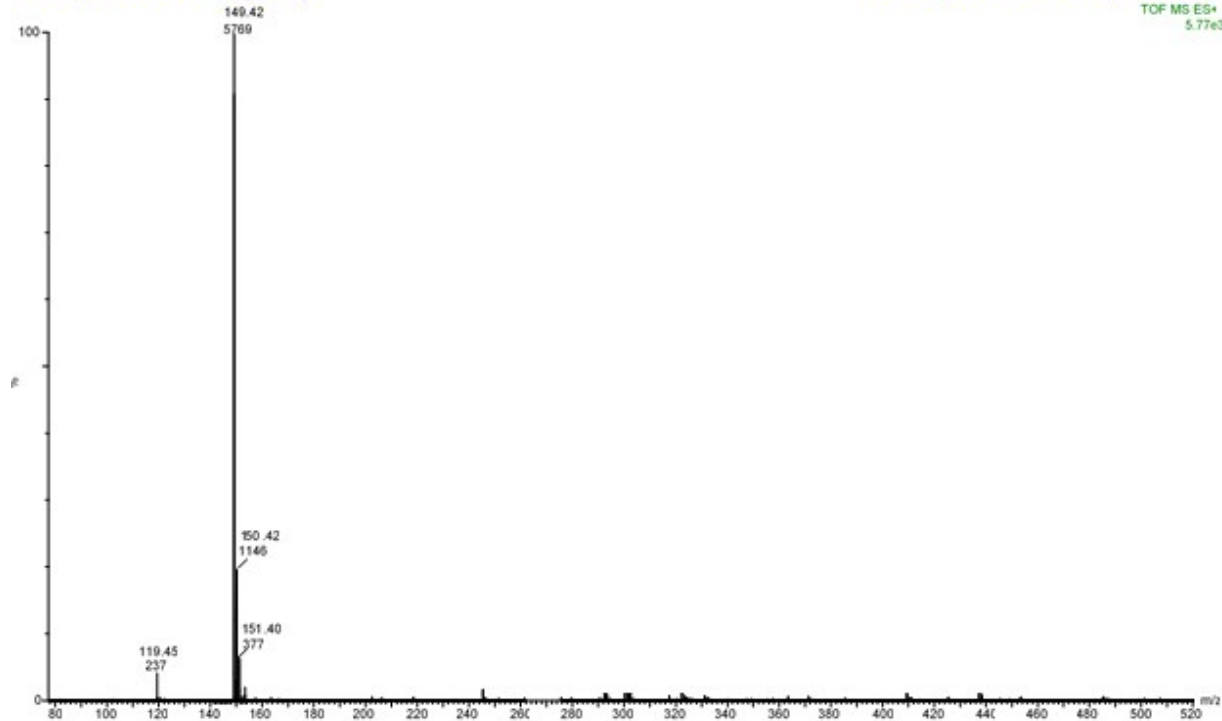

**Fig. S2.** Mass spectrum of compound 1

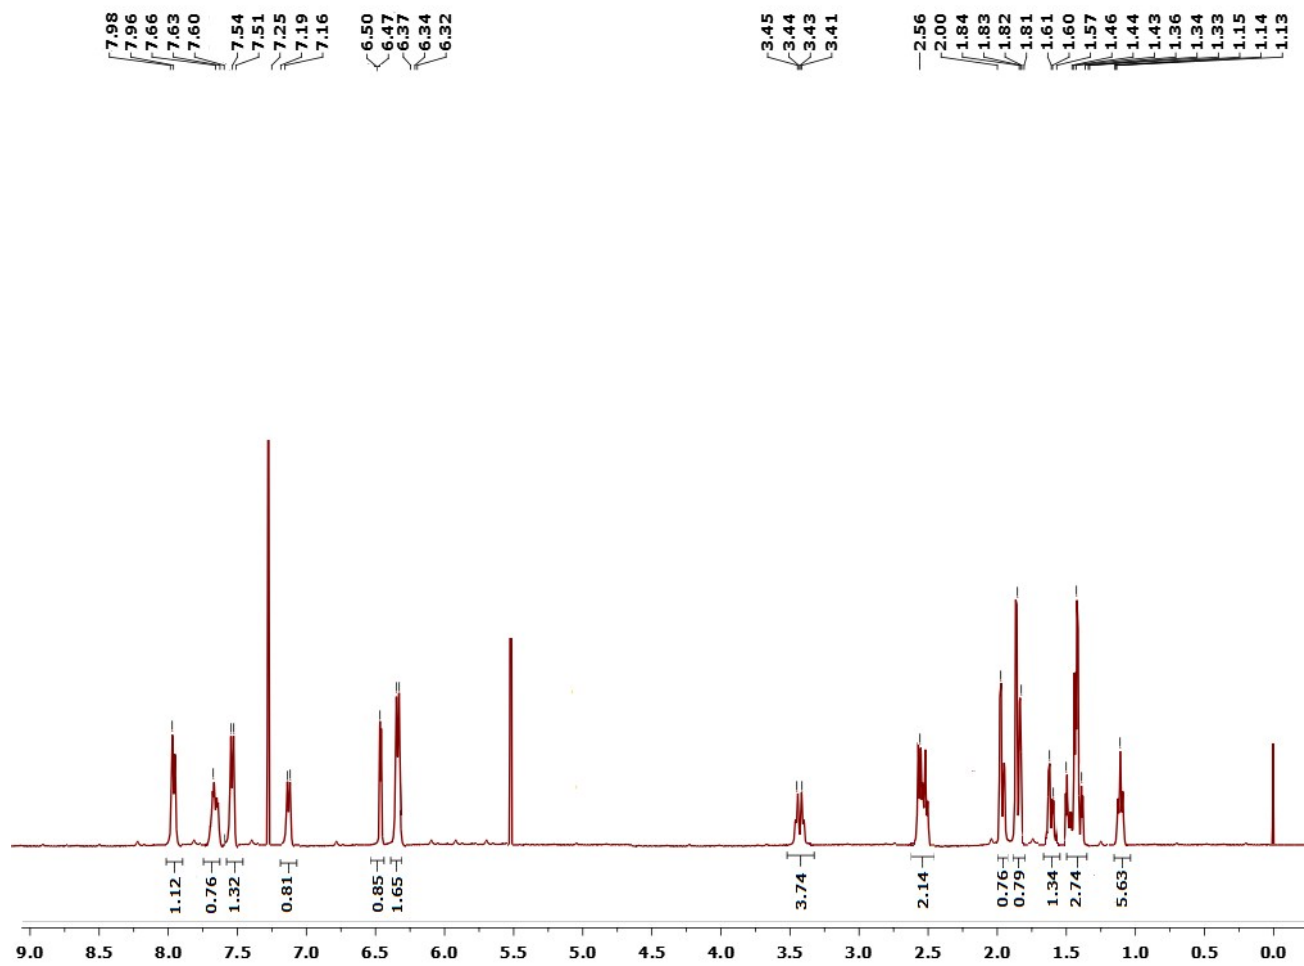

Fig. S3.  $^1\text{H-NMR}$  spectrum of compound 3.

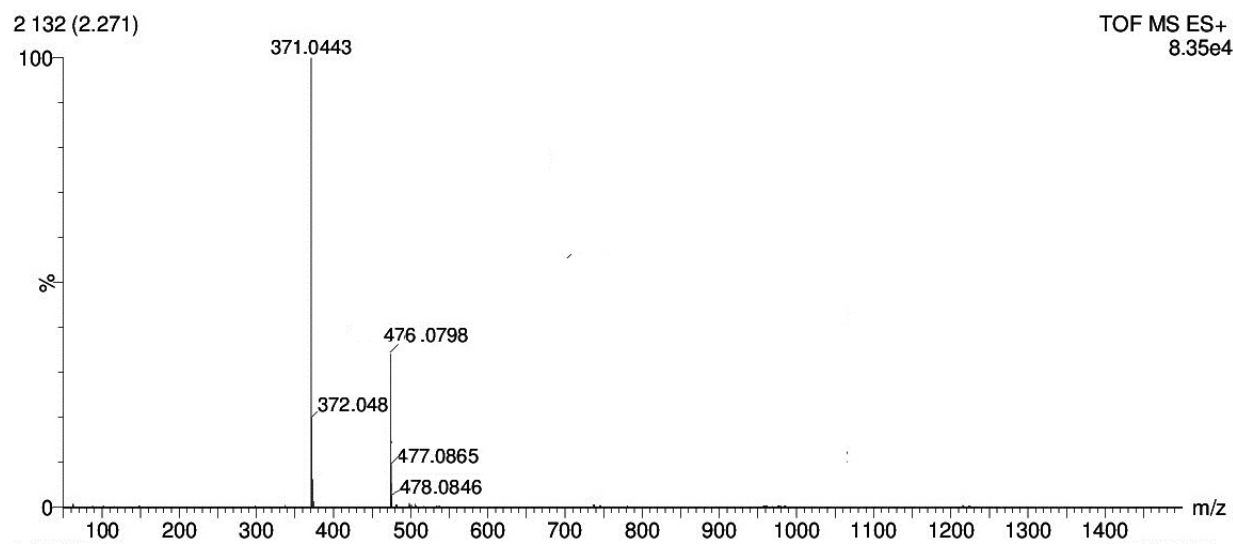

**Fig. S4.** Mass spectrum of compound 3.

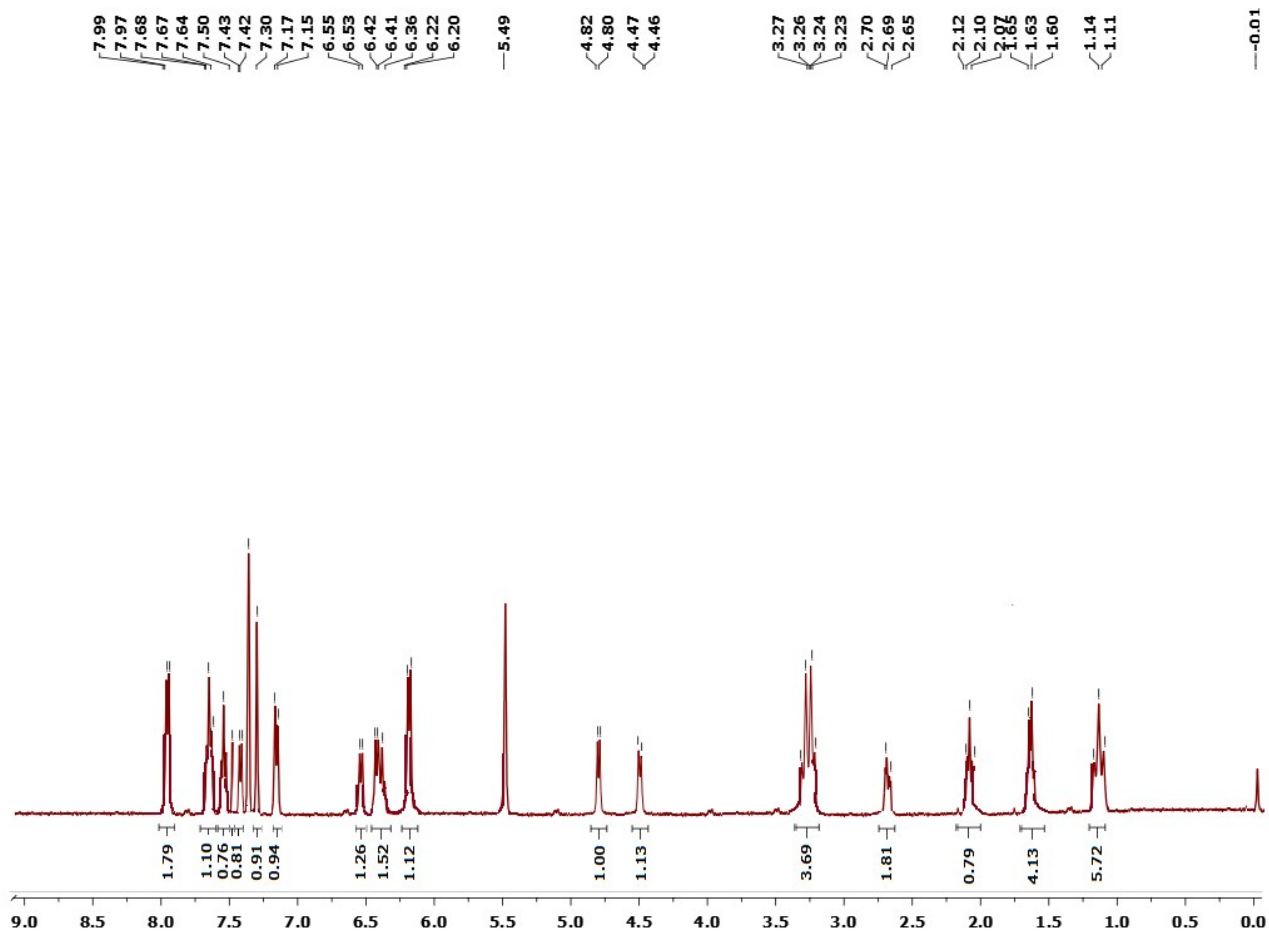

Fig. S5. <sup>1</sup>H-NMR spectrum of NIRM.

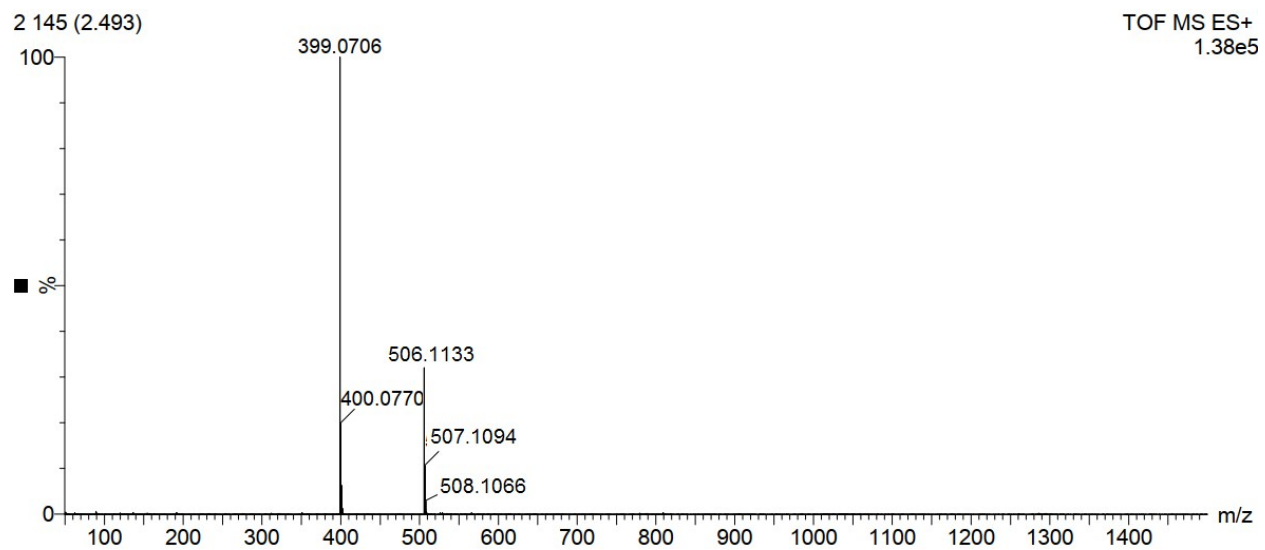

**Fig. S6.** Mass spectrum of probe NIRM.

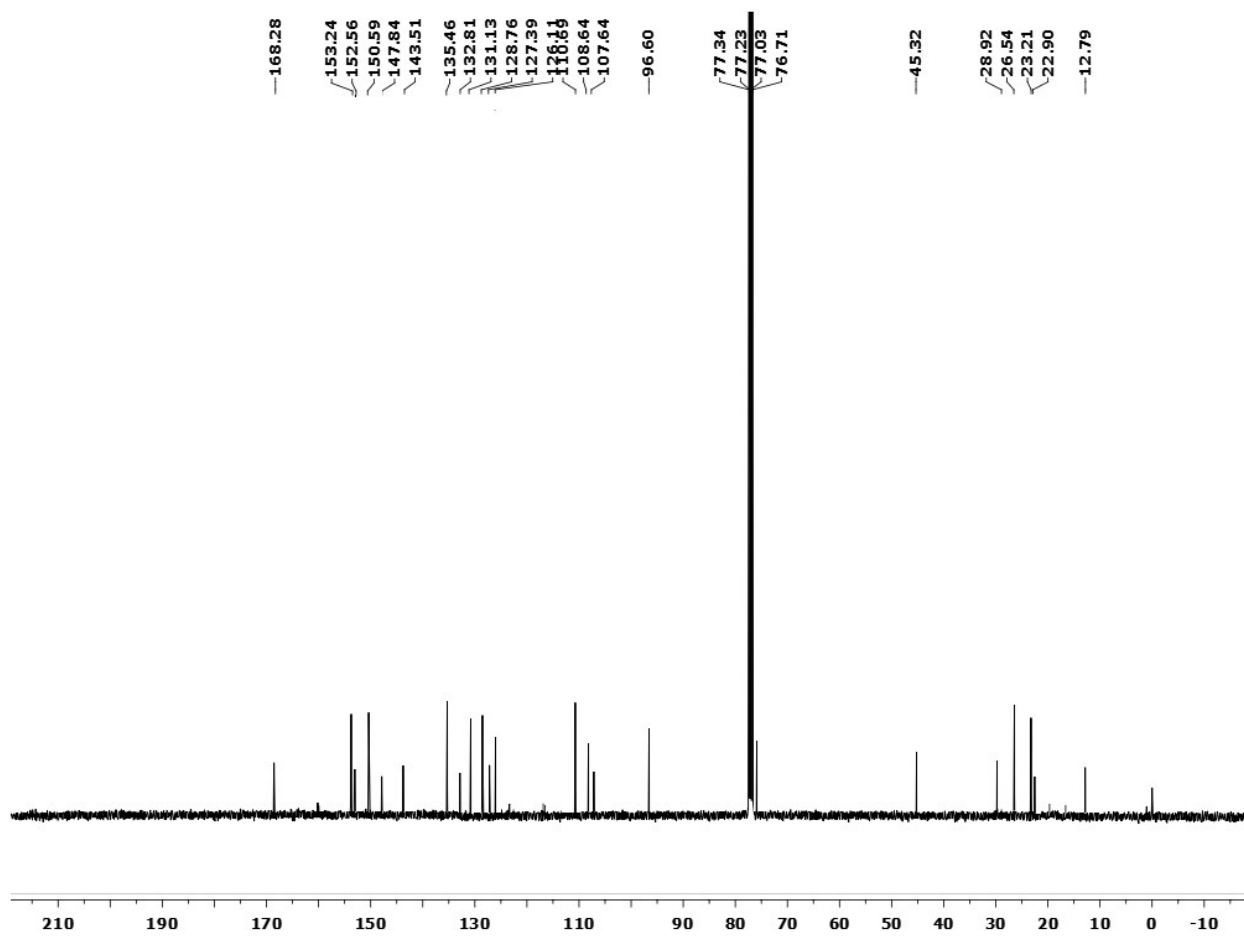

Fig. S7.  $^{13}\text{C}$ -NMR spectrum of probe NIRM.



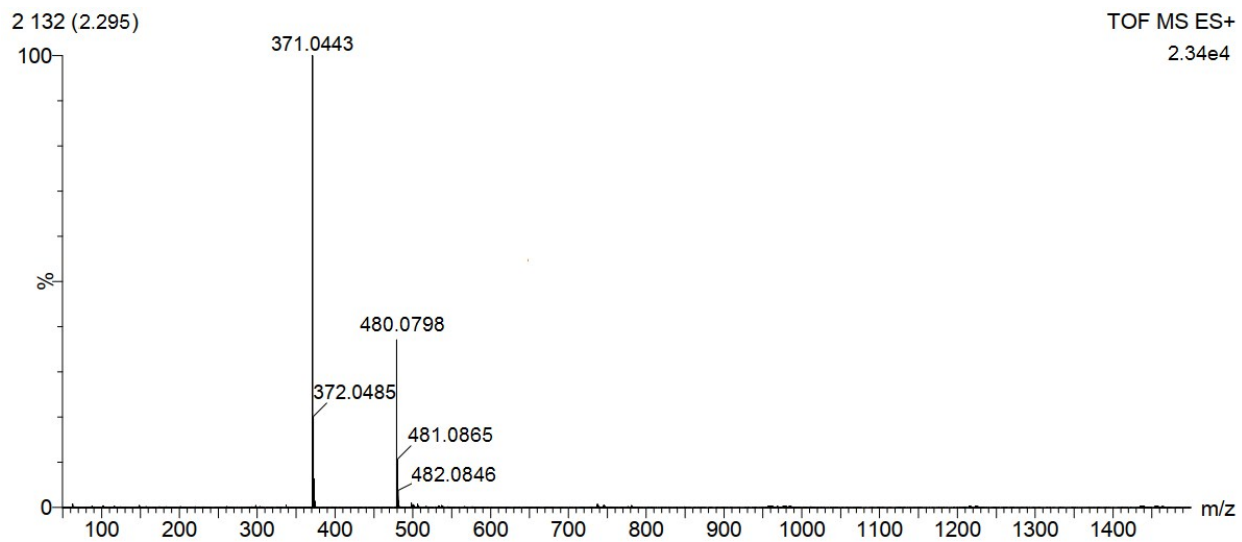

**Fig. S8.** Mass spectrum of control compound NIC.

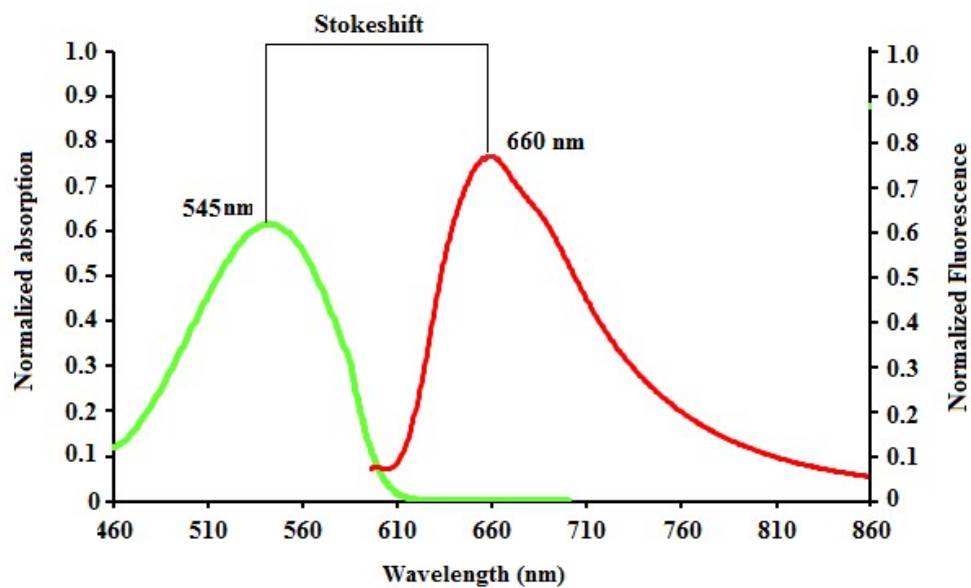

**Fig. S9.** UV-Visible spectra of probe NIRM (10  $\mu\text{M}$ ) and emission spectra of probe NIRM treated with 30  $\mu\text{M}$  solution of  $\text{Hg}^{2+}$  in Ethanol- $\text{H}_2\text{O}$  (2:8 v/v 50 mM HEPES buffer solution) at pH 7.4

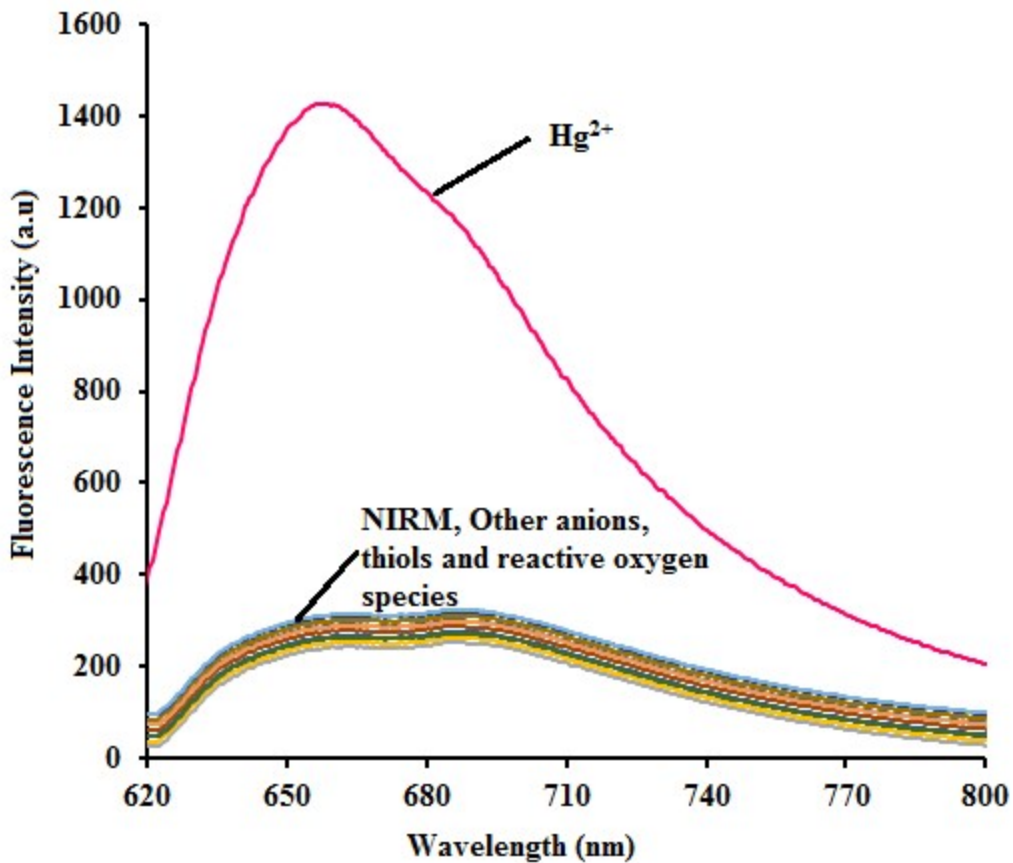

**Fig. S10.** Fluorescence responses of NIRM (10  $\mu\text{M}$ ) in Ethanol–H<sub>2</sub>O (2:8 v/v 50 mM HEPES buffer solution) at pH 7.4. with 30  $\mu\text{M}$  of various anions, biothiol and reactive oxygen species (Cl<sup>-</sup>, Br<sup>-</sup>, I<sup>-</sup>, CN<sup>-</sup>, CO<sub>3</sub><sup>2-</sup>, HCO<sub>3</sub><sup>-</sup>, CH<sub>3</sub>COO<sup>-</sup>(OAc), SO<sub>4</sub><sup>2-</sup>, F<sup>-</sup>, SCN<sup>-</sup>, HSO<sub>3</sub><sup>-</sup>, NO<sub>3</sub><sup>2-</sup>, SH<sup>-</sup>, Cys, HCy, GSH, H<sub>2</sub>O<sub>2</sub>, HClO, NO<sup>•</sup>, OH<sup>•</sup>, O<sub>2</sub><sup>-</sup>).

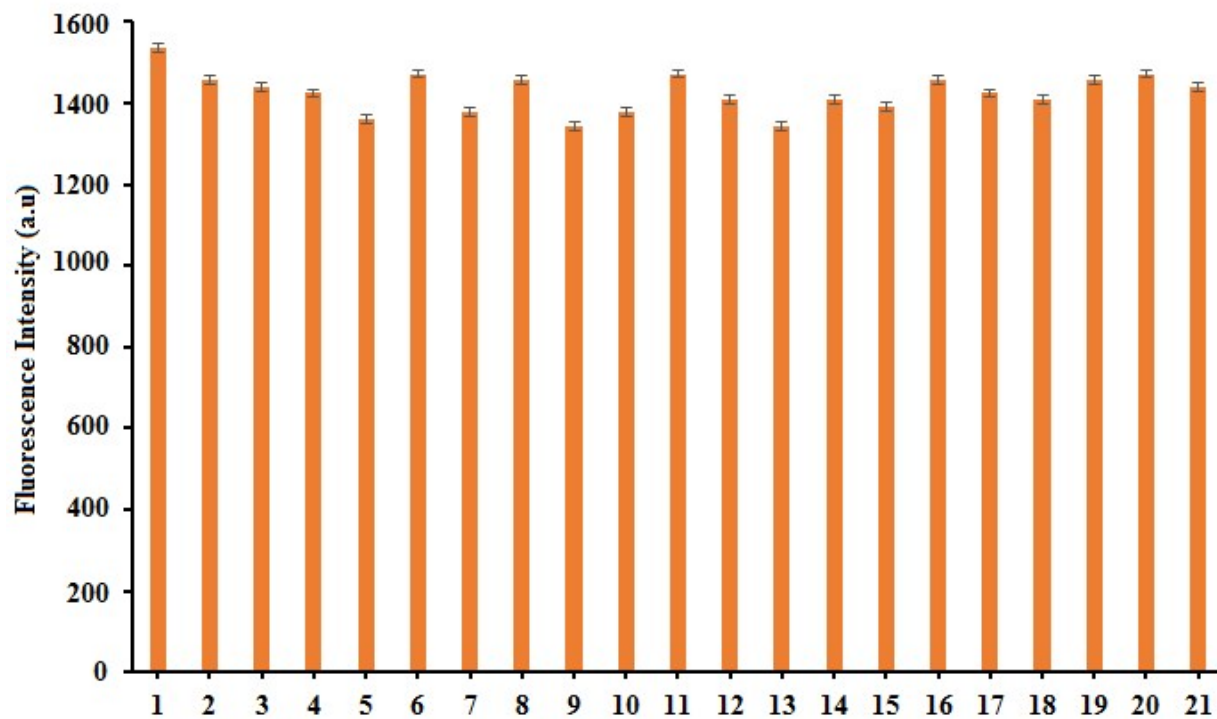

**Fig. S11.** Fluorescence response of NIRM (10  $\mu\text{M}$ ) at 660 nm in the presence of 30  $\mu\text{M}$  of  $\text{Hg}^{2+}$  and one different other species (30  $\mu\text{M}$ ). (1= $\text{Cl}^-$ , 2= $\text{Br}^-$ , 3= $\text{I}^-$ , 4= $\text{CN}^-$ , 5= $\text{CO}_3^{2-}$ , 6= $\text{HCO}_3^-$ , 7= $\text{CH}_3\text{COO}^-$ (OAc), 8= $\text{SO}_4^{2-}$ , 9= $\text{F}^-$ , 10= $\text{SCN}^-$ , 11= $\text{HSO}_3^-$ , 12= $\text{NO}_3^{2-}$ , 13= $\text{SH}^-$ , 14=Cys, 15=HCy, 16=GSH, 17= $\text{H}_2\text{O}_2$ , 18= $\text{HClO}$ , 19= $\text{NO}\cdot$  20= $\text{OH}\cdot$ , 21= $\text{O}_2^-$ ).

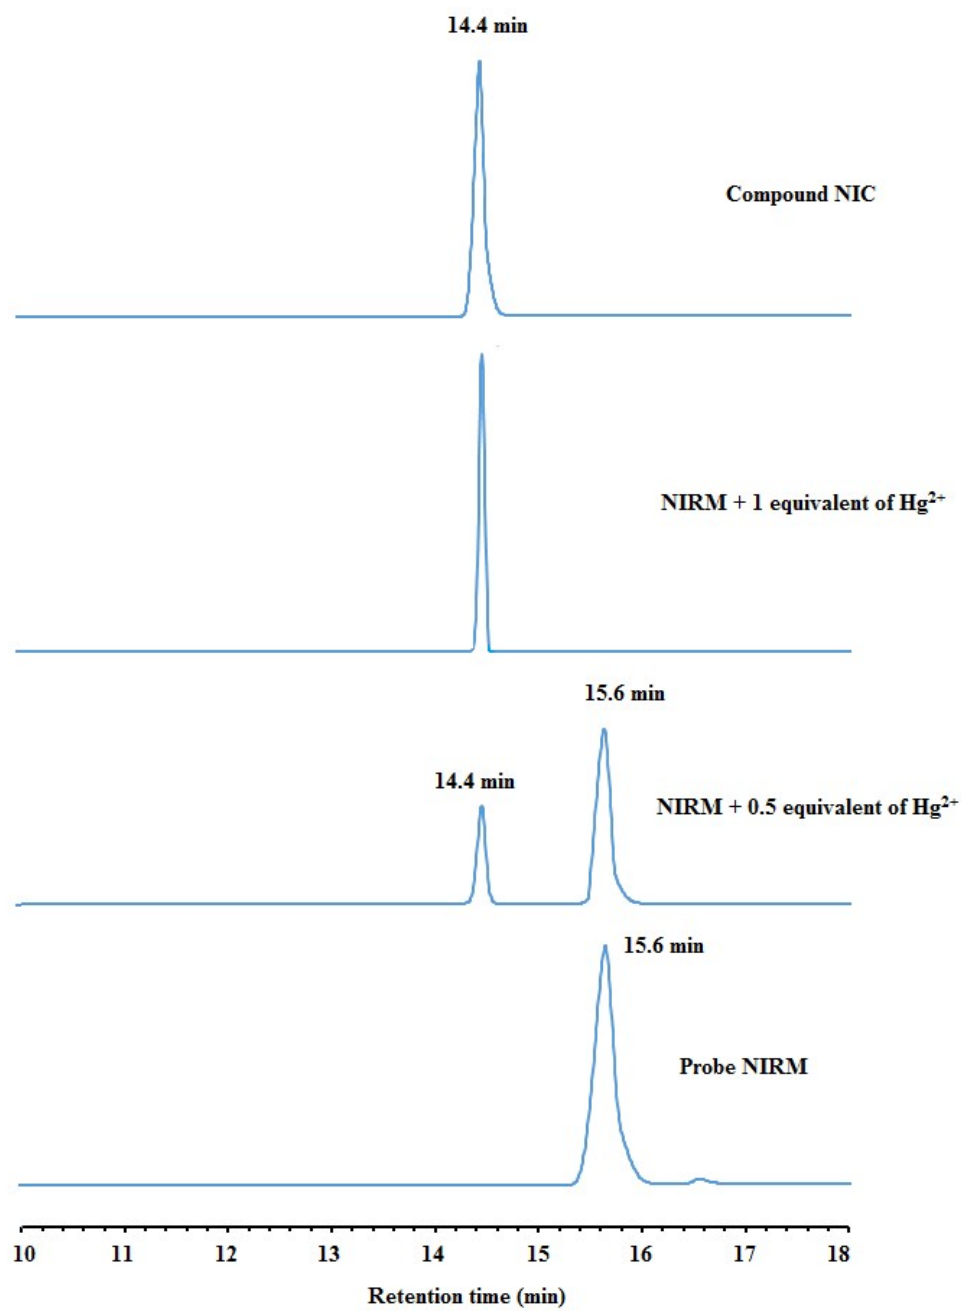

**Fig. S12.** HPLC chromatogram study of NIRM, NIC and NIRM treated with  $Hg^{2+}$ .

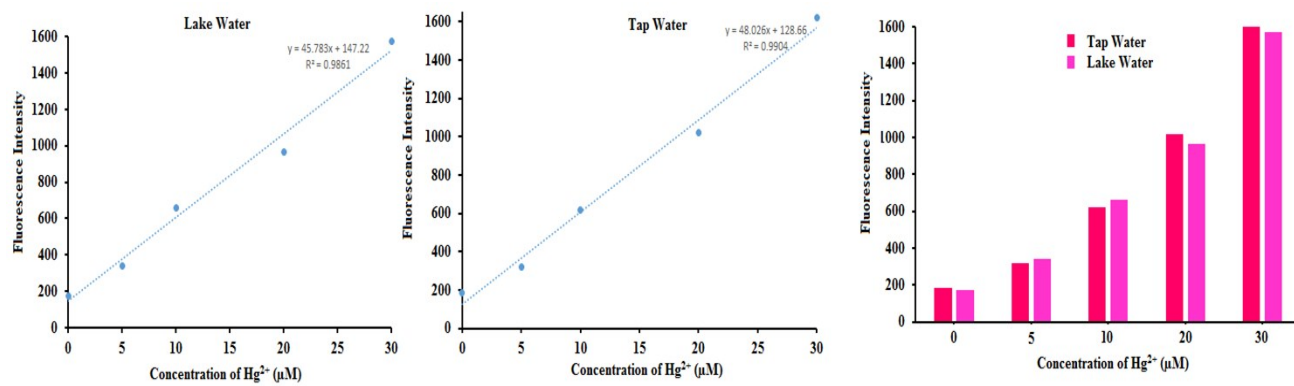

**Fig. S13.** Real sample analysis of  $\text{Hg}^{2+}$  in tap and lake water

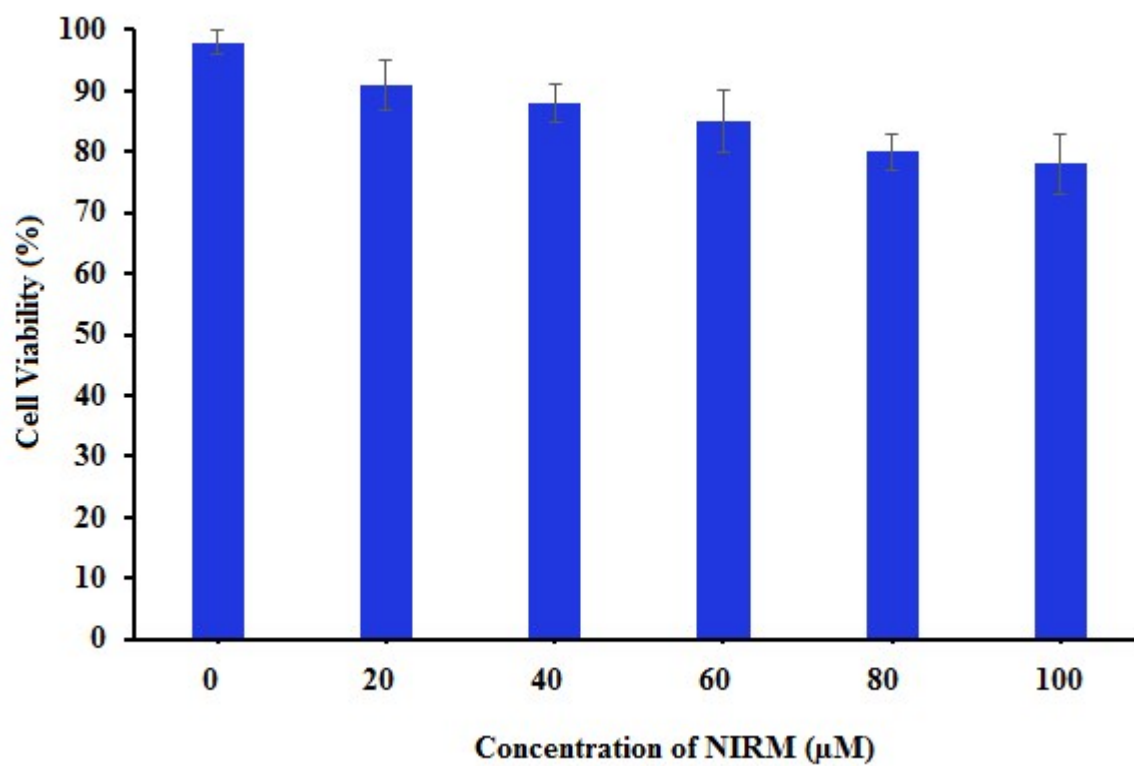

**Fig. S14.** MTT assay of probe NIRM.

**Table S1.** Determination of Hg<sup>2+</sup> in real samples.

| Sample     | Spiked amount of Hg <sup>2+</sup> (μM) | Found Amount of Hg <sup>2+</sup> Mean <sup>[a]</sup> ±SD <sup>[b]</sup> (μM) | Recovery (%) |
|------------|----------------------------------------|------------------------------------------------------------------------------|--------------|
| Tap Water  |                                        |                                                                              |              |
| 1          | 0                                      | -                                                                            | -            |
| 2          | 5                                      | 4.75 ± 0.03                                                                  | 95           |
| 3          | 10                                     | 9.83 ±0.08                                                                   | 98.3         |
| 4          | 20                                     | 19.81 ±0.06                                                                  | 99.05        |
| 5          | 30                                     | 29.63 ±0.05                                                                  | 98.7         |
| Lake Water |                                        |                                                                              |              |
| 1          | 0                                      | -                                                                            | -            |
| 2          | 5                                      | 4.85 ±0.1                                                                    | 97           |
| 3          | 10                                     | 9.89 ±0.05                                                                   | 98.9         |
| 4          | 20                                     | 19.91 ±0.08                                                                  | 99.5         |
| 5          | 30                                     | 29.92 ±0.12                                                                  | 99.7         |

**[a] Mean of five determination**

**[b]SD, standard deviation**



**Table S2.** Comparison of present probe with reported probes based on the vinyl ether group.

| Probe                                                                               | LOD                  | Quantum yield | Response time | Stoke shift | Imaging application | Ref |
|-------------------------------------------------------------------------------------|----------------------|---------------|---------------|-------------|---------------------|-----|
| 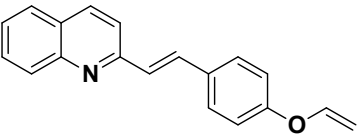   | $1 \times 10^{-7}$ M | -             | 3 min         | -           | -                   | 1   |
|    | -                    | 0.018         | 1 min         | -           | HeLa Cells          | 2   |
|   | 7.8 nM               | -             | 60 min        | 120 nm      | HeLa Cells          | 3   |
|  | 0.008 μM             | -             | 40 min        | -           | HeLa Cells          | 4   |
|  | 20 ppb               | 0.2           | 30 min        | -           | -                   | 5   |
|  | 20 nM                | -             | 60 min        | -           | -                   | 6   |

|                                                                                    |               |   |        |         |      |              |
|------------------------------------------------------------------------------------|---------------|---|--------|---------|------|--------------|
| 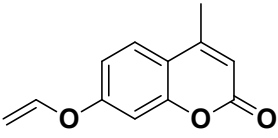  | 0.12 $\mu$ M  | - | 10 min | -       | -    | 7            |
|   | 37 nM         | - | -      | -       | -    | 8            |
|   | 0.045 $\mu$ M | - | 30 min | -       | -    | 9            |
|  | 3.2 nM        |   | 10 min | >110 nm | HeLa | THIS<br>WORK |

## References

1. Y. Zhang, Y. Yan, S. Chen, Z. Gao and H. Xu, *Bioorg. Med. Chem. Lett.*, 2014, **24**, 5373–5376.
2. Y. Chen, C. Yang, Z. Yu, B. Chen and Y. Han, *RSC Adv.*, 2015, **5**, 82531-82534.
3. B. Gu, L. Huang, N. Mi, P. Yin, Y. Zhang, X. Tu, X. Luo, S. Luo and S. Yao, *Analyst*, 2015, **140**, 2778-2784.
4. B. Zhu, W. Wang, L. Liu, H. Jiang, B. Du and Q. Wei, *Sens. Actuators, B*, 2014, **191**, 605–611
5. M. Santra, B. Roy and K.H. Ahn *Org. Lett.*, 2011, **13**, 3422–3425.
6. S. Ando and K. Koide, *J. Am. Chem. Soc.*, 2011, **133**, 2556–2566.
7. C. Wu, J. Wang, J. Shen, C. Bi and H. Zhou, *Sens. Actuators, B*, 2017, **243** 678–683
8. A. Wang, Y. Yang, F. Yu, L. Xue, B. Hu, W. Fan and Y. Dong, *Talanta*, 2015, **132**, 864–870.
9. S. Zhang, J. Geng, W. Yang and X. Zhang, *RSC Adv.*, 2014, **4**, 12596–12600.
